# Supplementary material for: Integrating Signals from the T-Cell Receptor and the Interleukin-2 Receptor
Source: PLOS journal article supplement (doi:10.1371/journal.pcbi.1002121), 2011-08-04
Supplement: S12 (10.1371/journal.pcbi.1002121.s012) [file journal.pcbi.1002121.s012]

**Table S1**

The ON-interpretation is as follows:

|                      |                                                            |
|----------------------|------------------------------------------------------------|
| complex              | formation of the complex, recruitment                      |
| kinases              | kinase activity, including proper localization             |
| phosphatases         | phosphatase activity, including proper localization        |
| adaptor              | recruitment                                                |
| transcription factor | nuclear localization and transcriptional activity          |
| secondary messenger  | increased presence of the molecule                         |
| ligand               | presence                                                   |
| E3 ubiquitin ligase  | ubiquitin transfer                                         |
| GEF                  | nucleotide exchange activity                               |
| GAP                  | binding to small GTPase and stimulation of GTPase activity |
| phospholipase        | lipid hydrolysis                                           |

| Name        | Full Name                                                                                    | Type or different ON-Interpretation |
|-------------|----------------------------------------------------------------------------------------------|-------------------------------------|
| A20         | zinc finger A20 domain-containing protein 1/<br>cellular zinc finger anti-NF-kappa-B protein | de-ubiquitinating enzyme            |
| ABL         | Abelson protein tyrosine kinase                                                              | kinase                              |
| Aiolos      | zinc finger protein Aiolos                                                                   | transcription factor                |
| AKAP79      | adaptorkinase (PRKA) protein anchor 79                                                       | adaptor                             |
| AP1         | v-jun sarcoma virus 17 oncogene homology                                                     | transcription factor                |
| b-catenin   | catenin (cadherin-associated protein) beta 1                                                 |                                     |
| BAD         | BCL2-antagonist of cell death                                                                | unphosphorylated active form        |
| BCL10       | B-cell CLL/lymphoma 10                                                                       | expression                          |
| Bcl2        | B-cell CLL/lymphoma 2                                                                        | expression                          |
| BCLXL       | BCL2-like 1                                                                                  | expression                          |
| Blimp-1     | beta-interferon gene positive- regulatory do-<br>main I binding factor                       | transcription factor                |
| BM          | complex of CARMA1 and BCL10                                                                  | complex                             |
| c-myc       | v-myc myelocytomatosis viral oncogene ho-<br>molog (avian)                                   | transcription factor                |
| c-RAF       | v-raf-1 murine leukemia viral oncogene ho-<br>molog 1                                        | kinase                              |
| CA          | calcium                                                                                      | secondary messenger                 |
| CABIN1      | calcineurin-binding protein                                                                  | adaptor                             |
| calcineurin | calcineurin                                                                                  | phosphatase                         |
| CaM         | calmodulin                                                                                   | Ca <sup>2+</sup> -bound active form |
| CAMK2       | calcium/calmodulin-dependent protein kinase<br>(CaM kinase) II                               | kinase                              |

|              |                                                                  |                           |
|--------------|------------------------------------------------------------------|---------------------------|
| CAMK4        | calcium/calmodulin-dependent protein kinase IV                   | kinase                    |
| cAMP         | cyclic AMP                                                       | secondary messenger       |
| CARD11       | caspase recruitment domain family, member 11                     | recruitment               |
| CASPASE-8    | caspase 8                                                        | proteolytic activity      |
| Cbl:Grb2     | complex of Cbl and Grb2                                          | complex                   |
| Cbl:Grb2:Shc | complex of Cbl, Grb2, and Shc                                    | complex                   |
| CBLB         | Cas-Br-M (murine) ecotropic retroviral transforming sequence b   | E3 ubiquitin ligase       |
| CBM          | complex of CARD11, CARMA1, and BCL10                             | complex                   |
| CCBL         | Casitase B-lineage lymphoma protooncogene (all pools)            | E3 ubiquitin ligase       |
| CCBLP1       | Casitase B-lineage lymphoma protooncogene (ZAP70-dependent pool) | E3 ubiquitin ligase       |
| CCBLP2       | Casitase B-lineage lymphoma protooncogene (ZAP70-dependent pool) | E3 ubiquitin ligase       |
| CCBLR        | Casitase B-lineage lymphoma protooncogene (inactive reseroir)    | E3 ubiquitin ligase       |
| CD28         | CD28 antigen (Tp44)                                              | receptor                  |
| CD4          | CD4 antigen (p55)                                                | receptor                  |
| CD45         | protein tyrosine phosphatase, receptor type, C                   | phosphatase               |
| CDC42        | cell division cycle 42 (GTP binding protein, 25kDa)              | small GTPase              |
| cFLIP        | caspase-related inducer of apoptosis                             | presence                  |
| cFLIP-p22    | cFLIP, short proteolytic fragment                                | presence                  |
| cFLIP-p43    | cFLIP, short proteolytic fragment                                | presence                  |
| CIS          | cytokine-inducible SH2-containing                                | binding to JAKs           |
| CRE          | cAMP responsive element binding protein 1                        | nuclear localization      |
| CREB         | cAMP responsive element                                          | transcrtption             |
| CrkL         | Crk-like protein                                                 | adaptor                   |
| CrkL:p85     | complex of p85 (PI3K subunit) and CrkL                           | complex                   |
| CSK          | c-src tyrosine kinase                                            | kinase                    |
| Csp1         | Calcipressin 1                                                   | binding to calcineurin    |
| CYC1         | cytochrome c-1                                                   | release from mitochondria |
| cyclin A     | cyclin A                                                         | expression                |
| cyclin D3    | cyclin D3                                                        | expression                |
| cyclin/cdk   | complex of cyclin and cylin-dependent kinase                     | kinase                    |
| DAG          | diacylglycerol                                                   | secondary messenger       |
| DAG (PLA)    | diacylglycerol (PLA-derived species)                             | secondary messenger       |
| DAG (PLD)    | diacylglycerol (PLD-pathway-derived species)                     | secondary messenger       |
| DGK          | diacylglycerol kinase (all isoforms)                             | kinase                    |
| DGKa         | diacylglycerol kinase alpha                                      | kinase                    |

|         |                                                                                             |                      |
|---------|---------------------------------------------------------------------------------------------|----------------------|
| E2F     | PRB-binding protein E2F                                                                     | transcription factor |
| ERK     | Extracellular signal-regulated kinases, mitogen-activated protein kinase 1                  | kinase               |
| FKHR    | forkhead box O1A                                                                            | transcription factor |
| FOS     | FOS-like antigen                                                                            | expression           |
| FYN     | FYN oncogene related to SRC, FGR, YES                                                       | kinase               |
| GAB2    | GRB2-associated binding protein 2                                                           | adaptor              |
| GADD45  | growth arrest and DNA-damage-inducible, alpha                                               | presence             |
| GADS    | GRB2-related adaptor protein 2                                                              | adaptor              |
| GAP     | GTPase-activating protein                                                                   | Ras-GAP              |
| GRB2    | growth factor receptor-bound protein 2                                                      | adaptor              |
| GSK3    | glycogen synthase kinase 3                                                                  | kinase               |
| HPK1    | Hematopoietic progenitor kinase 1, mitogen-activated protein kinase kinase kinase 1         | kinase               |
| IKB     | inhibitor protein IkappaB                                                                   | binding to NFkappaB  |
| IKKAB   | inhibitor of kappa light polypeptide gene enhancer in B-cells, kinase alpha and kinase beta | kinase               |
| IKKG    | inhibitor of kappa light polypeptide gene enhancer in B-cells, kinase gamma                 | kinase               |
| IL2     | interleukin-2                                                                               | ligand               |
| IL2Ra   | IL-2 receptor alpha chain                                                                   | receptor             |
| IL2Rabg | IL-2 receptor complex: alpha, beta, and common gamma chain                                  | receptor             |
| IL2Rb   | IL-2 receptor beta chain                                                                    | receptor             |
| IL2Rbg  | medium affinity IL-2 receptor: beta and common gamma chain                                  | receptor             |
| IL2Rgc  | IL-2 receptor common gamma chain                                                            | receptor             |
| IP3     | inositol 1,4,5-trisphosphate                                                                | secondary messenger  |
| IRS     | insulin receptor substrate                                                                  | adaptor              |
| ITK     | IL2-inducible T-cell kinase                                                                 | kinase               |
| JAK1    | janus kinase 1                                                                              | kinase               |
| JAK3    | janus kinase 2                                                                              | kinase               |
| JNK     | mitogen-activated protein kinase 8                                                          | kinase               |
| JUN     | v-jun sarcoma virus 17 oncogene homolog                                                     | expression           |
| LAT     | linker for activation of T cells                                                            | adaptor              |
| LCK     | lymphocyte-specific protein tyrosine kinase (all pools)                                     | kinase               |
| LCKP1   | lymphocyte-specific protein tyrosine kinase (CD4-dependent pool)                            | kinase               |
| LCKP2   | lymphocyte-specific protein tyrosine kinase (CD28/TCR-dependent pool)                       | kinase               |

|            |                                                                           |                      |
|------------|---------------------------------------------------------------------------|----------------------|
| LCKR       | lymphocyte-specific protein tyrosine kinase (inactive reservoir)          | kinase               |
| MALT1      | mucosa associated lymphoid tissue lymphoma translocation gene 1           | presence             |
| MEK        | mitogen-activated protein kinase kinase                                   | kinase               |
| MEKK1      | mitogen-activated protein kinase kinase kinase                            | kinase               |
| MKK4       | mitogen-activated protein kinase kinase 4                                 | kinase               |
| MLK3       | mitogen-activated protein kinase kinase kinase 11                         | kinase               |
| mTOR       | mammalian target of rapamycin                                             | kinase               |
| NFAT       | nuclear factor of activated T-cells, cytoplasmic, calcineurin-dependent 1 | transcription factor |
| NFKB       | nuclear factor of kappa light polypeptide gene enhancer in B-cells 1, 2   | transcription factor |
| nPKC       | protein kinase C, novel isoforms                                          | kinase               |
| P21Cip1    | cyclin-dependent kinase inhibitor 1A (p21, Cip1)                          | binding to cdk       |
| P27Kip     | cyclin-dependent kinase inhibitor 1B (p27,Kip1)                           | binding to cdk       |
| P38        | mitogen-activated protein kinase 14                                       | kinase               |
| P70S6K     | ribosomal protein S6 kinase, 70kDa, polypeptide 1                         | kinase               |
| PA         | phosphatidic acid                                                         | secondary messenger  |
| PAG        | phosphoprotein associated with glycosphingolipid microdomains 1           | adaptor              |
| pCbl:pCrkL | phosphotyrosine-dependent complex of Cbl and CrkL                         | complex              |
| PDK1       | 3-phosphoinositide dependent protein kinase-1                             | kinase               |
| pGab2:CrkL | phosphotyrosine-dependent complex of Gab2 and CrkL                        | complex              |
| PI3K       | phosphoinositide-3-kinase, catalytic, alpha polypeptide                   | kinase               |
| pIL2R      | IL-2 receptor complex, phosphorylated at beta chain                       | receptor             |
| PIP3       | phosphatidylinositol (3,4,5)-trisphosphate                                | secondary messenger  |
| PKB        | v-akt murine thymoma viral oncogene homolog 1                             | kinase               |
| PKCTH      | protein kinase C theta                                                    | kinase               |
| PKCz       | protein kinase C zeta                                                     | kinase               |
| PLA        | phospholipase adaptor                                                     | phospholipase        |
| PLCGA      | phospholipase C gamma 1, active form                                      | phospholipase        |

|        |                                                                                                                |                           |
|--------|----------------------------------------------------------------------------------------------------------------|---------------------------|
| PLCGB  | phospholipase C gamma 1, recruited to LAT but enzymatically inactive                                           | phospholipase             |
| PLD    | phospholipase D                                                                                                | phospholipase             |
| pRB    | retinoblastoma tumor suppressor protein                                                                        |                           |
| PTEN   | phosphatase and tensin homolog (mutated in multiple advanced cancers 1)                                        | phosphatase               |
| RAC1P1 | ras-related C3 botulinum toxin substrate 1 (rho family, small GTP binding protein Rac1) (Vav-1 dependent pool) | small GTPase              |
| RAC1P2 | ras-related C3 botulinum toxin substrate 1 (rho family, small GTP binding protein Rac1) (Vav-3 dependent pool) | small GTPase              |
| RAC1R  | ras-related C3 botulinum toxin substrate 1 (rho family, small GTP binding protein Rac1) (inactive reservoir)   | small GTPase              |
| RAF    | v-raf-1 murine leukemia viral oncogene (all isoforms)                                                          | kinase                    |
| RAS    | small GTPase Ras                                                                                               | small GTPase              |
| RASGRP | Ras guanyl releasing protein 1                                                                                 | Ras-GEF                   |
| RIP1   | receptor interacting protein kinase 1                                                                          | kinase                    |
| RIP2   | receptor interacting protein kinase 1                                                                          | kinase                    |
| RLK    | TXK tyrosine kinase                                                                                            | kinase                    |
| RSK    | ribosomal protein S6 kinase, 90kDa, polypeptide 1                                                              | kinase                    |
| S6     | ribosomal protein S6                                                                                           | regulation of translation |
| SH3BP2 | SH3-domain binding protein 2                                                                                   | adaptor                   |
| Shc    | SH2 domain-containing-transforming protein C                                                                   | adaptor                   |
| SHIP1  | inositol polyphosphate-5-phosphatase, 145kDa                                                                   | phosphatase               |
| SHP1   | protein tyrosine phosphatase, nonreceptor type 6                                                               | phosphatase               |
| SHP2   | protein tyrosine phosphatase, nonreceptor type 11 (Noonan syndrome 1)                                          | phosphatase               |
| SLP76  | lymphocyte cytosolic protein 2 (SH2 domain containing leukocyte protein of 76kDa)                              | adaptor                   |
| SOCS-1 | suppressor of cytokine signaling 1                                                                             | binding to JAKs           |
| SOCS-3 | suppressor of cytokine signaling 3                                                                             | binding to JAKs           |
| SOS    | Son of Sevenless                                                                                               | Ras-GEF                   |
| SRE    | serum responsive element                                                                                       | transcription factor      |
| STAT3  | signal transducer and activator of transcription 3                                                             | transcription factor      |
| STAT5  | signal transducer and activator of transcription 3                                                             | transcription factor      |

|        |                                                             |                     |
|--------|-------------------------------------------------------------|---------------------|
| Syk    | spleen tyrosine kinase                                      | kinase              |
| TCRB   | T-cell Receptor (bound to ligand)                           | receptor            |
| TCRLIG | ligand of T cell receptor (peptide-MHC complex or antibody) | ligand              |
| TCRP   | T-cell Receptor phosphorylated                              | receptor            |
| TRAF2  | tumor necrosis factor type 2 receptor associated protein 3  | E3 ubiquitin ligase |
| TRAF6  | tumor necrosis factor type 2 receptor associated protein 6  | E3 ubiquitin ligase |
| VAV1   | Vav 1 oncogene                                              | Rac-GEF             |
| VAV3   | Vav 3 oncogene                                              | Rac-GEF             |
| X      | Non-identified kinase involved in CD28-mediated signaling   | kinase              |
| ZAP70  | zeta-chain (TCR) associated protein kinase 70kDa            | kinase              |
